# Supplementary material for: SLC22 Transporters in the Fly Renal System Regulate Response to Oxidative Stress In Vivo
Source: MDPI journal article supplement (doi:10.3390/ijms222413407), 2021-12-14
Supplement: s1 [file s1]

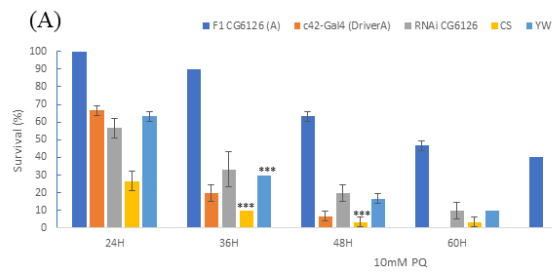

|          | F1 v c42-Gal4 (DriverA) | F1 v RNAi | F1 v CS   | F1 vs YW  |
|----------|-------------------------|-----------|-----------|-----------|
| 24 hours | 0.0098525               | 0.0228602 | 0.0081634 | 0.0081634 |
| 36 hours | 0.0067341               | 0.0421585 | ***       | ***       |
| 48 hours | 0.0034424               | 0.0058652 | ***       | 0.0198039 |
| 60 hours | 0.0050633               | 0.0081634 | 0.0058652 | 0.0081634 |
| 72 hours | ***                     | 0.0098525 | ***       | 0.0098525 |
| 84 hours | 0.0081634               | 0.0081634 | 0.0081634 | 0.0081634 |

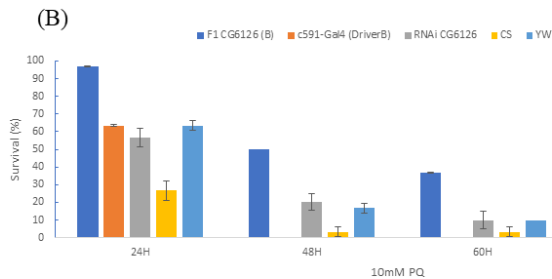

|          | F1 v c591-Gal4 (DriverB) | F1 v RNAi | F1 v CS   | F1 vs YW  |
|----------|--------------------------|-----------|-----------|-----------|
| 24 hours | 0.0098525                | 0.0202041 | 0.0067341 | 0.0098525 |
| 48 hours | ***                      | 0.0350987 | 0.0050633 | 0.0098525 |
| 60 hours | 0.0081634                | 0.0152681 | 0.0098525 | 0.0152681 |
| 84 hours | 0.0377496                | 0.0377496 | 0.0377496 | 0.0377496 |

**Supplementary Figure S1:** Knockdowns generated with CG6126 and Driver A and B, respectively, show resistance to paraquat induced oxidative stress. CG6126 Driver A knockdowns were created using parent lines: BDSC Stock 56038 (CG6126) and BDSC Stock 30835 (driver A). Each time point listed has shown statistical significance ( $p < 0.05$ ) when total survival was compared at that moment, unless noted otherwise. Error bars represent standard error. \*\*\* is used to indicate time points where statistical analysis via T-test yielded error due to the nature of the data. However, based on other significant timepoints, we expect these indicated points to show increased resistance as well. Data in graph A of Supplementary Figure 1 show comparisons between knockdowns generated with BDSC Stock 56038 (CG6126) and BDSC Stock 30835 (Driver A). Data in graph B of Supplementary Figure 1 show comparisons between knockdowns generated with BDSC Stock 56038 (CG6126) and BDSC Stock 30843 (Driver B). Alongside graphs A and B are tables that display associated p-values.

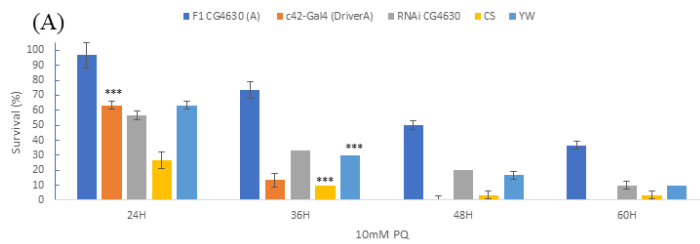

|          | F1 v c42-Gal4 (DriverA) | F1 v RNAi | F1 v CS   | F1 vs YW  |
|----------|-------------------------|-----------|-----------|-----------|
| 24 hours | ***                     | 0.0315040 | 0.0198039 | 0.0098525 |
| 36 hours | 0.0130725               | 0.0377496 | ***       | ***       |
| 48 hours | 0.0058652               | 0.0198039 | 0.0050633 | 0.0098525 |
| 60 hours | 0.0081634               | 0.0741799 | 0.0377496 | 0.0152681 |

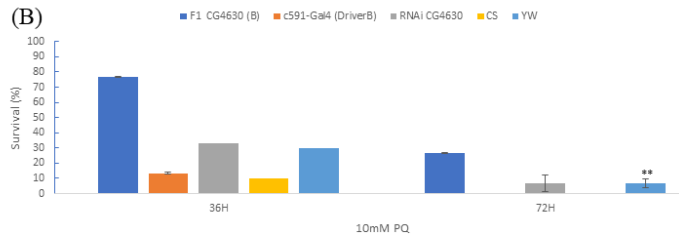

|          | F1 v c591-Gal4 (DriverB) | F1 v RNAi | F1 v CS   | F1 vs YW  |
|----------|--------------------------|-----------|-----------|-----------|
| 36 hours | 0.0188442                | 0.0202041 | 0.0024907 | 0.0050633 |
| 72 hours | 0.0152681                | 0.0377496 | 0.0152681 | **        |

**Supplementary Figure S2:** Knockdowns generated with CG4630 and Driver A and B, respectively, show resistance to paraquat induced oxidative stress. CG4630 driver A knockdowns were created using parent lines: BDSC Stock 61249 (CG4630) and BDSC Stock 30835 (driver A). Each time point listed has shown statistical significance ( $p < 0.05$ ) when total survival was compared at that moment, unless noted otherwise. Error bars represent standard error. \*\*\* is used to indicate time points where statistical analysis via T-test yielded error due to the nature of the data. However, based on other significant timepoints, we expect these indicated points to show increased resistance as well. \*\* indicates  $p$ -value  $> 0.05$  for that specific comparison and timepoint. Data in graph A of Supplementary Figure 2 show comparisons between knockdowns generated with BDSC Stock 61249 (CG4630) and BDSC Stock 30835 (Driver A). Data in graph B of Supplementary Figure 2 show comparisons between knockdowns generated with BDSC Stock 61249 (CG4630) and BDSC Stock 30843 (Driver B). Alongside graphs A and B are tables that display associated  $p$ -values.

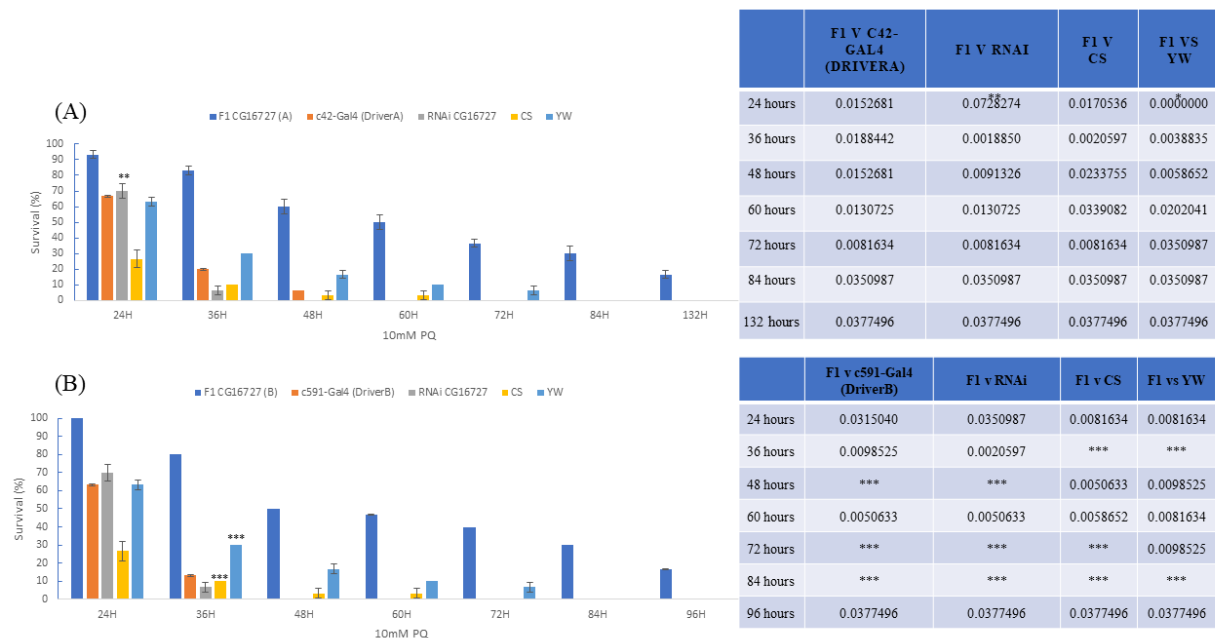

**Supplementary Figure S3:** Knockdowns generated with CG16727 and Driver A and B, respectively, show resistance to paraquat induced oxidative stress. CG16727 driver A knockdowns were created using parent lines: BDSC Stock 57434 (CG16727) and BDSC Stock 30835 (driver A). Each time point listed has shown statistical significance ( $p < 0.05$ ) when total survival was compared at that moment, unless noted otherwise. Error bars represent standard error. \*\*\* is used to indicate time points where statistical analysis via T-test yielded error due to the nature of the data. However, based on other significant timepoints, we expect these indicated points to show increased resistance as well. \*\* indicates  $p$ -value  $> 0.05$  for that specific comparison and timepoint. Data in graph A of Supplementary Figure 3 show comparisons between knockdowns generated with BDSC Stock 57434 (CG16727) and BDSC Stock 30835 (Driver A). Data in graph B of Supplementary Figure 3 show comparisons between knockdowns generated with BDSC Stock 57434 (CG16727) and BDSC Stock 30843 (driver B). Alongside graphs A and B are tables that display associated  $p$ -values. \* indicates a  $p$ -value of 4.1119371E-18 for F1 CG16727 (A) vs YW.

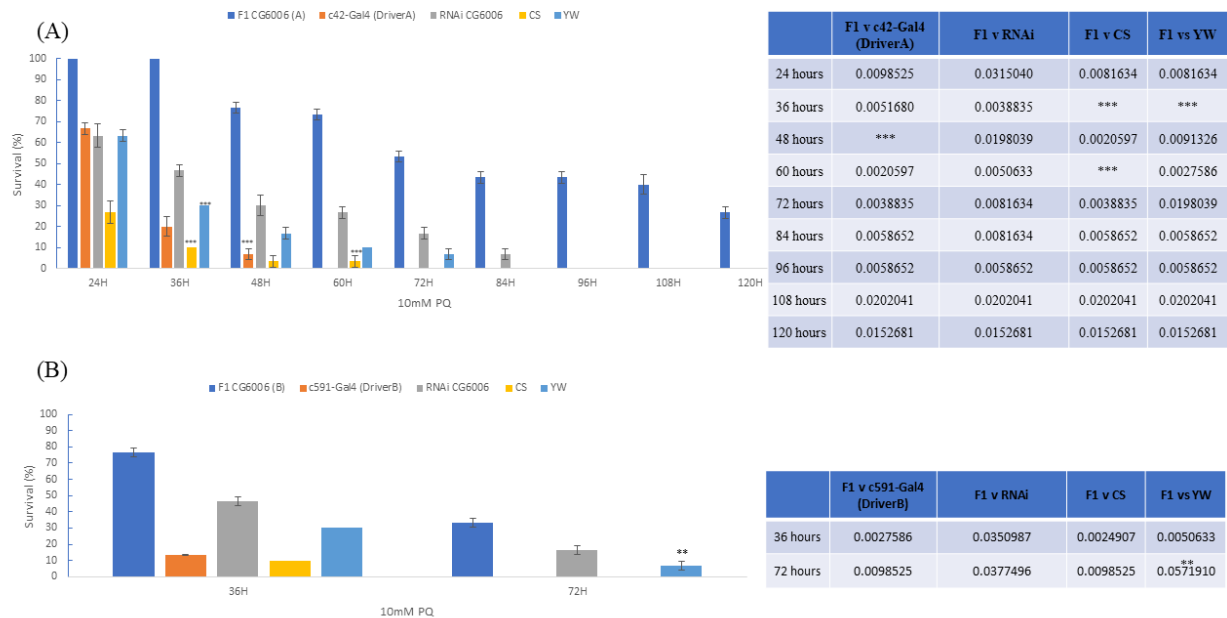

**Supplementary Figure S4:** Knockdowns generated with CG6006 and Driver A and B, respectively, show resistance to paraquat induced oxidative stress. CG6006 Driver A knockdowns were created using parent lines: BDSC Stock 55282 (CG6006) and BDSC Stock 30835 (Driver A). Each time point listed has shown statistical significance ( $p < 0.05$ ) when total survival was compared at that moment, unless noted otherwise. Error bars represent standard error. \*\*\* is used to indicate time points where statistical analysis via T-test yielded error due to the nature of the data. However, based on other significant timepoints, we expect these indicated points to show increased resistance as well. \*\* indicates  $p > 0.05$  for that specific comparison and timepoint. Data in graph A of Supplementary Figure 4 show comparisons between knockdowns generated with BDSC Stock 55282 (CG6006) and BDSC Stock 30835 (Driver A). Data in graph B of Supplementary Figure 4 show comparisons between knockdowns generated with BDSC Stock 55282 (CG6006) and BDSC Stock 30843 (Driver B). Alongside graphs A and B are tables that display associated p-values.
